# Supplementary material for: Main Challenges and Actions Needed to Improve Conservation and Sustainable Use of Our Crop Wild Relatives
Source: PubMed Central journal article supplement (PMC7463933; doi:10.3390/plants9080968), 2020-07-30
Supplement: plants-09-00968-s001.pdf [file plants-09-00968-s001.pdf]

**Table S1:** Guidelines and tools for crop wild relative (CWR) conservation

| Title <sup>1</sup>                                                                                                     | Content                                                                                                                                | Type        | Publisher/<br>source                               | Language       | Availability                                                                                                                                                                                                                                                                                                                       |
|------------------------------------------------------------------------------------------------------------------------|----------------------------------------------------------------------------------------------------------------------------------------|-------------|----------------------------------------------------|----------------|------------------------------------------------------------------------------------------------------------------------------------------------------------------------------------------------------------------------------------------------------------------------------------------------------------------------------------|
| Voluntary Guidelines for the Conservation and Sustainable Use of Crop Wild Relatives and Wild Food Plants <sup>2</sup> | Primarily for use by governments to develop a national plan for the conservation and sustainable use of CWR and wild food plants.      | Publication | FAO                                                | EN, FR, ES, AR | Available for download:<br><a href="http://www.fao.org/publications/card/en/c/8f366de9-08a8-42ad-aae1-4f8f6822420e/">http://www.fao.org/publications/card/en/c/8f366de9-08a8-42ad-aae1-4f8f6822420e/</a>                                                                                                                           |
| CWR checklists, strategies, action plans                                                                               | List of CWR checklists and strategies                                                                                                  | Webpage     | Bioversity International                           | EN             | <a href="http://www.cropwildrelatives.org/cwr-strategies/">http://www.cropwildrelatives.org/cwr-strategies/</a>                                                                                                                                                                                                                    |
| Crop Wild Relatives - A manual of <i>in situ</i> conservation <sup>3</sup>                                             | Captures important practical experiences of CWR <i>in situ</i> conservation in Armenia, Bolivia, Madagascar, Sri Lanka and Uzbekistan. | Publication | Earthscan                                          | EN, FR, ES     | Available for download:<br><a href="http://www.cropwildrelatives.org/resources/in-situ-conservation-manual/">http://www.cropwildrelatives.org/resources/in-situ-conservation-manual/</a>                                                                                                                                           |
| Interactive toolkit for CWR conservation planning <sup>4</sup>                                                         | Provides guidance to plan and implement active <i>in situ</i> and <i>ex situ</i> conservation of CWR at national level.                | Website     | Bioversity International, University of Birmingham | EN             | <a href="http://www.cropwildrelatives.org/conservation-toolkit/">http://www.cropwildrelatives.org/conservation-toolkit/</a>                                                                                                                                                                                                        |
| Core Descriptors for In Situ Conservation of Crop Wild Relatives, v.1. <sup>5</sup>                                    | The descriptors are designed to facilitate the compilation and exchange of data for CWR <i>in situ</i> conservation activities.        | Publication | Bioversity International                           | EN             | Available for download:<br><a href="https://www.biodiversityinternational.org/e-library/publications/detail/core-descriptors-for-in-situ-conservation-of-crop-wild-relatives-v1/">https://www.biodiversityinternational.org/e-library/publications/detail/core-descriptors-for-in-situ-conservation-of-crop-wild-relatives-v1/</a> |
| Crop Wild Relative Checklist and Inventory                                                                             | Descriptors for the standardized development of CWR checklists and                                                                     | Publication | Bioversity International                           | EN             | Available for download:<br><a href="https://www.biodiversityinternational.org/e-">https://www.biodiversityinternational.org/e-</a>                                                                                                                                                                                                 |

<sup>1</sup> The footnotes contain the full citation of the respective resource; the numbers in square brackets refer to the reference number in the reference list of the review paper.

<sup>2</sup> FAO *Voluntary Guidelines for the Conservation and Sustainable Use of Crop Wild Relatives and Wild Food Plants*. Food and Agriculture Organization of the United Nations, Rome, Italy, 2017, 106p. [19]

<sup>3</sup> Hunter, D.; Heywood V. (ed.). *Crop Wild Relatives. A Manual of in situ Conservation*. Routledge, London, UK, 2011, 414p. [55]

<sup>4</sup> Magos Brehm J.; Kell S.; Thormann I.; Gaisberger H.; Dulloo E.; Maxted N. Interactive Toolkit for Crop Wild Relative Conservation Planning Version 1.0. University of Birmingham, Birmingham, UK, Bioversity International, Rome, Italy, 2017a. Available at <http://www.cropwildrelatives.org/conservation-toolkit/>. [56]

<sup>5</sup> Thormann, I.; Alercia, A.; Dulloo, M.E. *Core descriptors for in situ conservation of crop wild relatives v.1*. Bioversity International, Rome, Italy, 2013, 28p. [60]

|                                                                                                                                                                                   |                                                                                                                                                                                                                    |            |                          |    |                                                                                                                                                                                                          |
|-----------------------------------------------------------------------------------------------------------------------------------------------------------------------------------|--------------------------------------------------------------------------------------------------------------------------------------------------------------------------------------------------------------------|------------|--------------------------|----|----------------------------------------------------------------------------------------------------------------------------------------------------------------------------------------------------------|
| Descriptors v.1 <sup>6</sup>                                                                                                                                                      | inventories                                                                                                                                                                                                        |            |                          |    | <a href="https://dataverse.harvard.edu/dataset.xhtml?persistentId=doi:10.7910/DVN/QH9XWB">library/publications/detail/crop-wild-relative-checklist-and-inventory-descriptors-v1/</a>                     |
| Template for the Preparation of a National Strategic Action Plan for the Conservation and Sustainable Use of Crop Wild Relatives <sup>7</sup>                                     | Template to assist countries in preparing their National Strategic Action Plans or National Strategies for the conservation and sustainable use of CWR.                                                            | Word file  | Bioversity International | EN | Available for download:<br><a href="https://dataverse.harvard.edu/dataset.xhtml?persistentId=doi:10.7910/DVN/QH9XWB">https://dataverse.harvard.edu/dataset.xhtml?persistentId=doi:10.7910/DVN/QH9XWB</a> |
| Template for the Preparation of a Technical Background Document for a National Strategic Action Plan for the Conservation and Sustainable Use of Crop Wild Relatives <sup>8</sup> | To assist countries in documenting and detailing the scientific aspects of the development of National Strategic Action Plans or National Strategies for the conservation and sustainable use of CWR.              | Word file  | Bioversity International | EN | Available for download:<br><a href="https://dataverse.harvard.edu/dataset.xhtml?persistentId=doi:10.7910/DVN/VQVDFA">https://dataverse.harvard.edu/dataset.xhtml?persistentId=doi:10.7910/DVN/VQVDFA</a> |
| CWR Checklist and Inventory Data Template v.1 <sup>9</sup>                                                                                                                        | Excel template to help users to establish a CWR checklist and inventory in a systematic manner.                                                                                                                    | Excel file | Bioversity International | EN | Available for download:<br><a href="https://dataverse.harvard.edu/dataset.xhtml?persistentId=doi:10.7910/DVN/B8YOQL">https://dataverse.harvard.edu/dataset.xhtml?persistentId=doi:10.7910/DVN/B8YOQL</a> |
| Occurrence Data Collation Template v.1 <sup>10</sup>                                                                                                                              | Assist users to collate and standardize plant species' occurrence data to perform data analyses needed for conservation planning, including facilitating the formatting of data required for the CAPFITOGEN tools. | Excel file | Bioversity International | EN | Available for download:<br><a href="https://dataverse.harvard.edu/dataset.xhtml?persistentId=doi:10.7910/DVN/5B9IV5">https://dataverse.harvard.edu/dataset.xhtml?persistentId=doi:10.7910/DVN/5B9IV5</a> |

<sup>6</sup> Bioversity International; University of Birmingham. Crop wild relative checklist and inventory descriptors, v.1. Bioversity International, Rome, Italy, 2017, 26p. [64]

<sup>7</sup> Dulloo, M.E.; Magos Brehm, J.; Kell, S.; Thormann, I.; Maxted, N. Template for the Preparation of a National Strategic Action Plan for the Conservation and Sustainable Use of Crop Wild Relatives. <https://doi.org/10.7910/DVN/QH9XWB>, Harvard Dataverse, V1. 2017, 23p. [108]

<sup>8</sup> Magos Brehm, J.; Kell, S.; Thormann, I.; Maxted, N.; Dulloo, E. Template for the Preparation of a Technical Background Document for a National Strategic Action Plan for the Conservation and Sustainable Use of Crop Wild Relatives, doi: 10.7910/DVN/VQVDFA, Harvard Dataverse, 2017b, 23p. [109]

<sup>9</sup> Thormann, I.; Kell, S.; Magos Brehm, J.; Dulloo, M.E.; Maxted, N. CWR Checklist and Inventory Data Template v.1, doi:10.7910/DVN/B8YOQL, Harvard Dataverse, 2017. [61]

<sup>10</sup> Magos Brehm, J.; Kell, S.; Thormann, I.; Gaisberger, H.; Dulloo, E.; Maxted, N. Occurrence Data Collation Template v.1, doi: 10.7910/DVN/5B9IV5, Harvard Dataverse, 2017. [62]

|                                                             |                                                                                                                                                                                 |                                  |                          |        |                                                                                                                                                                                                                                                                                                                                                     |
|-------------------------------------------------------------|---------------------------------------------------------------------------------------------------------------------------------------------------------------------------------|----------------------------------|--------------------------|--------|-----------------------------------------------------------------------------------------------------------------------------------------------------------------------------------------------------------------------------------------------------------------------------------------------------------------------------------------------------|
| Ecogeographic surveys <sup>11</sup>                         | Synthesis of new knowledge, procedures, best practices and references for collecting plant diversity                                                                            | Publication (book chapter)       | Bioversity International | EN     | Available for download: <a href="https://cropgenebank.sgrp.cgiar.org/index.php?option=com_content&amp;view=article&amp;id=679">https://cropgenebank.sgrp.cgiar.org/index.php?option=com_content&amp;view=article&amp;id=679</a>                                                                                                                     |
| CAPFITOGEN tools <sup>12</sup>                              | Suite of tools to support the analysis of geographical data and analyses                                                                                                        | Manuals and computer application | FAO                      | EN, ES | <a href="http://www.capfitogen.net/">http://www.capfitogen.net/</a>                                                                                                                                                                                                                                                                                 |
| Harlan and de Wet inventory <sup>13</sup>                   | Priority list of ca. 1,400 CWR species, along with key ancillary data (regional and national occurrence, seed storage behaviour, and herbaria housing major collections of CWR) | Online database                  | Crop Trust               | EN     | <a href="https://www.cwrdiversity.org/checklist/">https://www.cwrdiversity.org/checklist/</a>                                                                                                                                                                                                                                                       |
| Crop Wild Relative Global Occurrence Database <sup>14</sup> | Searchable and downloadable occurrence data on crop wild relatives and crops based on the taxa included in the Harlan and de Wet inventory.                                     | Online database                  | Crop Trust               | EN     | <a href="https://www.cwrdiversity.org/checklist/cwr-occurrences.php">https://www.cwrdiversity.org/checklist/cwr-occurrences.php</a> . The entire dataset is downloadable from the GBIF Website at <a href="https://www.gbif.org/dataset/07044577-bd82-4089-9f3a-f4a9d2170b2e">https://www.gbif.org/dataset/07044577-bd82-4089-9f3a-f4a9d2170b2e</a> |

<sup>11</sup> Castañeda Álvarez, N.P.; Vincent, H.A.; Kell, S.P.; Eastwood, R.J.; Maxted, N. Ecogeographic surveys. In: Guarino, L, Ramanatha Rao, V, Goldberg, E (eds) Collecting Plant Genetic Diversity: Technical Guidelines. Bioversity International, Rome, Italy 2011 update., 23pp [110]

<sup>12</sup> Parra-Quijano, M.; Torres, E.; Iriondo, J.M.; López, F. CAPFITOGEN Tools User Manual, Version 2.0. Rome: International Treaty on Plant Genetic Resources for Food and Agriculture, Food and Agriculture Organization of the United Nations, Rome, Italy, 2016, 260pp. [111]

<sup>13</sup> Vincent, H.; Wiersema, J.; Dobbie, S.; Kell, S.P.; Fielder, H.; Castañeda-Álvarez, N.P.; P, Eastwood, R.; Guarino, L.; Maxted, N. A prioritized crop wild relative inventory to help underpin global food security. *Biol. Cons.* 2013, 167, pp 265-275. [29]

<sup>14</sup> Centro Internacional de Agricultura Tropical - CIAT. A global database for the distributions of crop wild relatives. Version 1.12. Occurrence dataset <https://doi.org/10.15468/jyrthk> accessed via GBIF.org on 2020-06-28, Cali, Colombia, 2018. [112]
